# Supplementary material for: Vegetable oil as a highly effective 100% bio-based alternative solvent for the one-pot multicomponent Biginelli reaction
Source: Royal Society of Chemistry journal article supplement (doi:10.1039/d1gc00872b), 2021-01-01
Supplement: d1gc00872b1.pdf [file d1gc00872b1.pdf]

## Electronic Supplementary Information (ESI)

# Vegetable oil as a highly effective 100% bio-based alternative solvent for the one-pot multicomponent Biginelli reaction

Pakin Noppawan, Suwivat Sangon, Nontipa Supanchaiyamat and Andrew J. Hunt \*

Materials Chemistry Research Center, Department of Chemistry, Faculty of Science, Khon Kaen University, Khon Kaen, 40002, Thailand. Email: [andrew@kku.ac.th](mailto:andrew@kku.ac.th)

### Contents

|            |                                                                                                                 |
|------------|-----------------------------------------------------------------------------------------------------------------|
| Page 2     | Table S1. Full yields for the synthesis of <b>4</b> and the tautomerisation equilibrium constants of <b>3</b> . |
| Page 2     | Scheme S1 Solvent stabilization and the resulting tautomerization equilibrium of $\beta$ -keto-ester.           |
| Page 3     | Table S2. Fatty acid composition of palm, palm kernel, soybean, castor, linseed, jojoba, neem oils.             |
| Page 3     | Table S3. Effect of addition of impurity and degradation product in palm oil on reaction yield.                 |
| Page 3     | Table S4. Kamlet-Taft parameters, recovery and reaction yields of consecutive runs with recovered palm oil.     |
| Page 4     | Copy of $^1\text{H}$ NMR represent the presence of ethanol in recycling of palm oil                             |
| Pages 5-14 | Copies of $^1\text{H}$ NMR                                                                                      |
| Page 15-19 | Green chemistry metrics analysis                                                                                |
| Page 20    | References                                                                                                      |

**Table S1.** Full yields for the synthesis of **4** and the tautomerisation equilibrium constants of **3**.

| Solvent           | $\ln(K_T)$         | Yield | $\ln(4/1)$ |
|-------------------|--------------------|-------|------------|
| Castor oil        | -1.98 <sup>†</sup> | 27%   | -1.02      |
| CPME              | -1.48 <sup>†</sup> | 49%   | -0.02      |
| Cyclohexane       | -0.09              | 73%   | 1.02       |
| DMF               | -2.91              | 31%   | -0.82      |
| Jajoba oil        | -1.30 <sup>†</sup> | 53%   | 0.12       |
| Linseed oil       | -1.43 <sup>†</sup> | 44%   | -0.26      |
| Need oil          | n/a                | 45%   | -0.22      |
| n-Heptane         | 0.12 <sup>†</sup>  | 68%   | 0.78       |
| Palm oil          | -0.79 <sup>†</sup> | 74%   | 1.02       |
| Soybean oil       | -0.90 <sup>†</sup> | 65%   | 0.61       |
| TMO               | -1.23 <sup>†</sup> | 51%   | 0.05       |
| Waste palm oil    | -1.37 <sup>†</sup> | 57%   | 0.28       |
| Waste soybean oil | -1.82 <sup>†</sup> | 46%   | -0.18      |

<sup>†</sup>Predicted from equation of previous report<sup>1</sup>

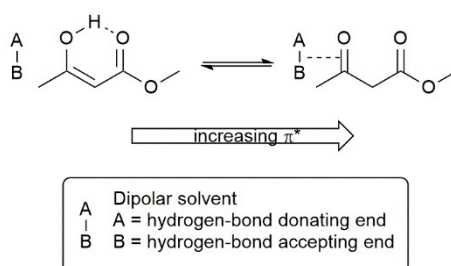

**Scheme S1** Solvent stabilization and the resulting tautomerization equilibrium of  $\beta$ -keto-ester<sup>1</sup>

**Table S2.** Fatty acid composition of palm, palm kernel, soybean, castor, linseed, jojoba, neem oils.

| Fatty acid                 | Palm oil | Palm kernel oil | Soybean oil | Castor oil | Linseed oil | Jojoba oil | Neem oil |
|----------------------------|----------|-----------------|-------------|------------|-------------|------------|----------|
| Caproic acid (C6:0)        | -        | 0.2             | -           | -          | -           | -          | -        |
| Caprylic acid (C8:0)       | -        | 3.3             | -           | -          | -           | -          | -        |
| Capric acid (C10:0)        | -        | 3.5             | -           | -          | -           | -          | -        |
| Lauric acid (C12:0)        | 0.2      | 47.8            | -           | -          | 0.08        | -          | -        |
| Myristic acid (C14:0)      | 1.1      | 16.3            | -           | -          | 0.08        | -          | -        |
| Palmitic acid (C16:0)      | 44.0     | 8.5             | 14.7        | 1.0        | 5.6         | 1.6        | 18.1     |
| Palmitoleic acid (C16:1)   | -        | -               | -           | -          | 0.1         | 0.1        | -        |
| Stearic acid (C18:0)       | 4.5      | 2.4             | 5.4         | 1.1        | 4.0         | 0.1        | 18.1     |
| Oleic acid (C18:1)         | 39.2     | 15.4            | 26.8        | 3.3        | 19.3        | 11.2       | 44.5     |
| Ricinoleic acid (C18:1-OH) | -        | -               | -           | 89.1       | -           | -          | -        |
| Linoleic acid (C18:2)      | 10.1     | 2.4             | 44.4        | 4.6        | 17.2        | -          | 18.3     |
| Linolenic acid (C18:3)     | 0.4      | -               | 8.0         | 0.5        | 48.8        | -          | 0.2      |
| Arachidic acid (C20:0)     | 0.1      | 0.1             | 0.4         | -          | 0.2         | 0.2        | 0.8      |
| Eicosenoic acid (C20:1)    | -        | -               | -           | 0.3        | 0.1         | 70.7       | -        |
| Behenic acid (C22:0)       | -        | -               | 0.33        | -          | -           | 0.3        | -        |
| Erucic acid (C22:1)        | -        | -               | -           | -          | -           | 14.1       | -        |
| Lignoceric acid (C24:0)    | -        | -               | -           | -          | -           | 0.02       | -        |
| Nervonic acid (C24:1)      | -        | -               | -           | -          | -           | 1.6        | -        |
| Reference                  | 2        | 2               | 3           | 4          | 5           | 6          | 7        |

**Table S3.** Effect of addition of impurity and degradation products in palm oil on reaction yield.

| Impurity/degradation product | Mole of addition | Yield |
|------------------------------|------------------|-------|
| Ethanol                      | 0.5 mmol         | 41.2% |
| Glycerol                     | 0.5 mmol         | 43.1% |
| Palmitic acid                | 0.5 mmol         | 37.5% |
| Acrylamide                   | 0.5 mmol         | 37.5% |

**Table S4.** Kamlet-Taft parameters,<sup>8-10</sup> recovery and reaction yields of consecutive runs with recovered palm oil.

| Solvent                   | $\alpha$ | $\beta$ | $\pi^*$ | recovery | Yield |
|---------------------------|----------|---------|---------|----------|-------|
| Native                    | -0.12    | 1.22    | 0.21    | 98%      | 70%   |
| 1 <sup>st</sup> recovered | -0.11    | 1.23    | 0.20    | 98%      | 67%   |
| 2 <sup>nd</sup> recovered | -0.11    | 1.23    | 0.20    | 97%      | 57%   |
| 3 <sup>rd</sup> recovered | -0.12    | 1.21    | 0.22    | 96%      | 57%   |
| 4 <sup>th</sup> recovered | -0.11    | 1.23    | 0.20    | 92%      | 58%   |

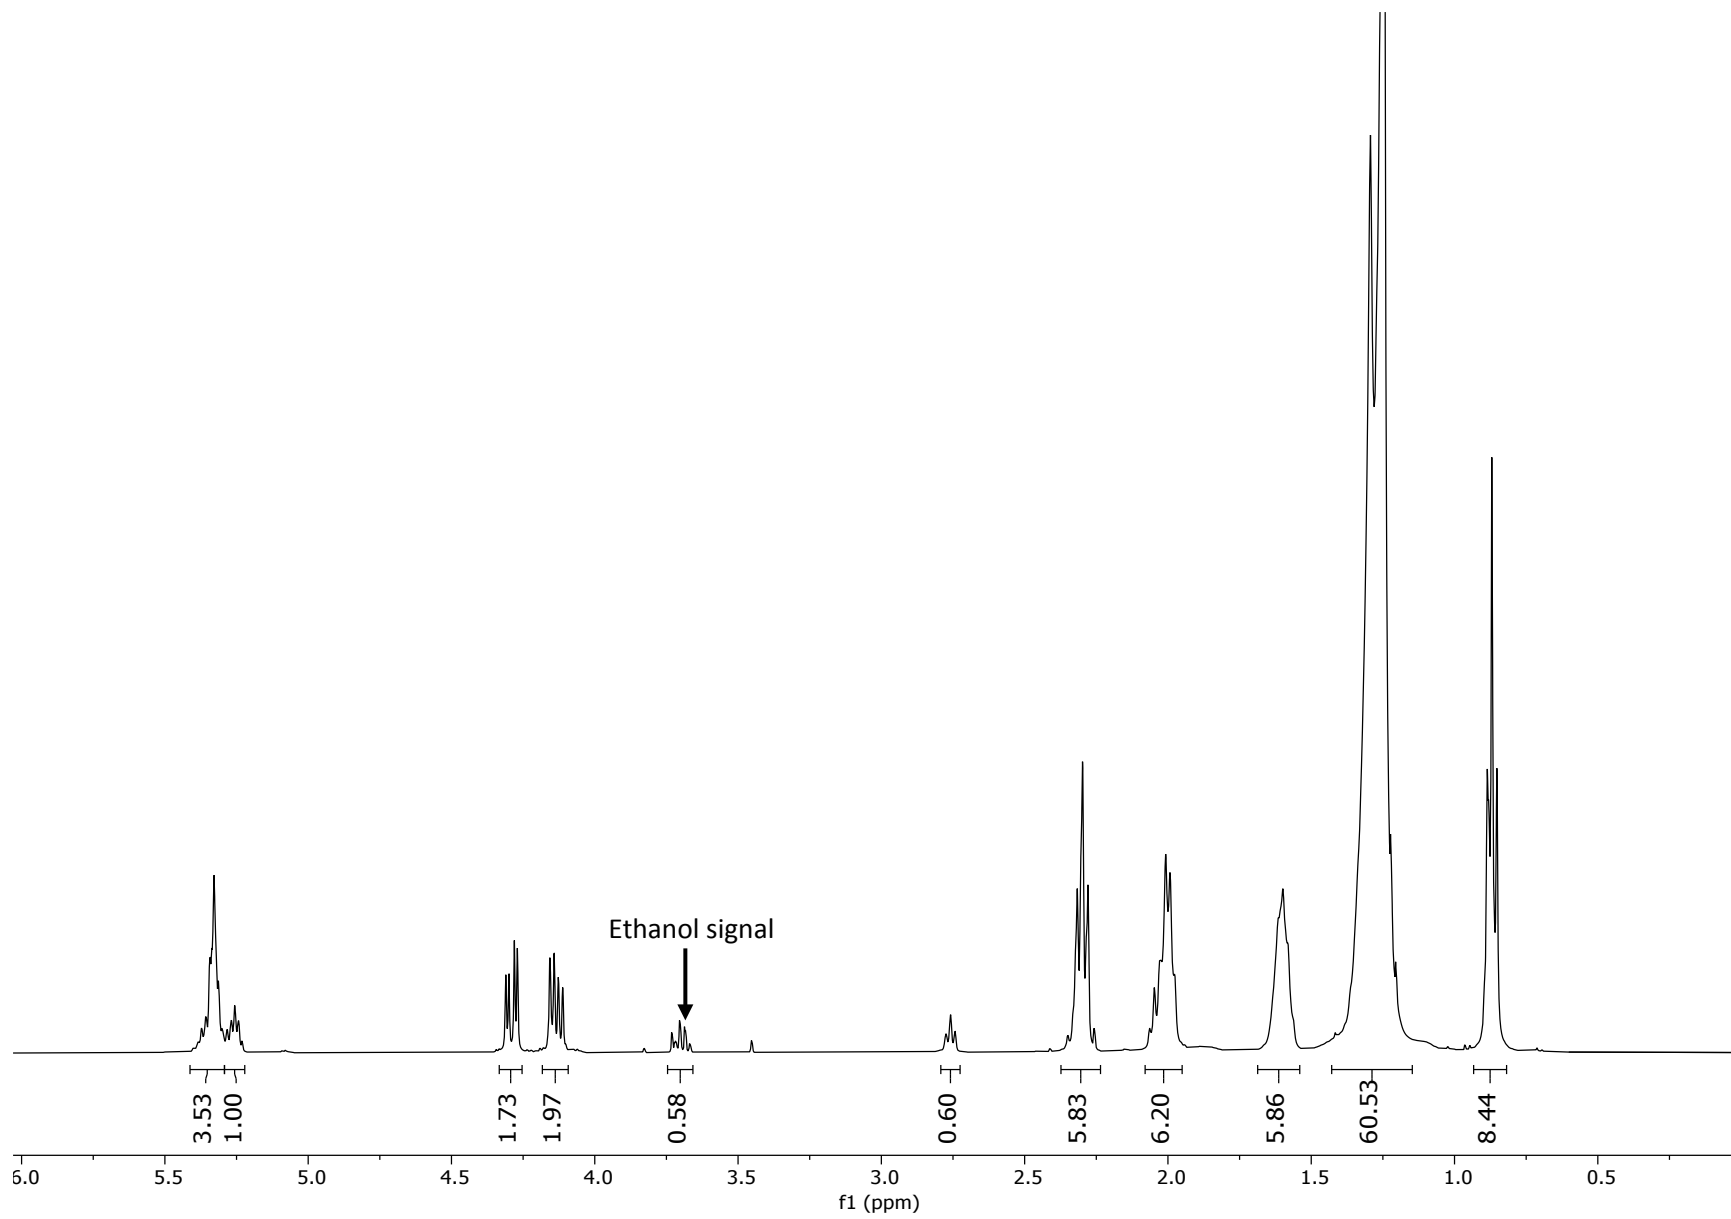

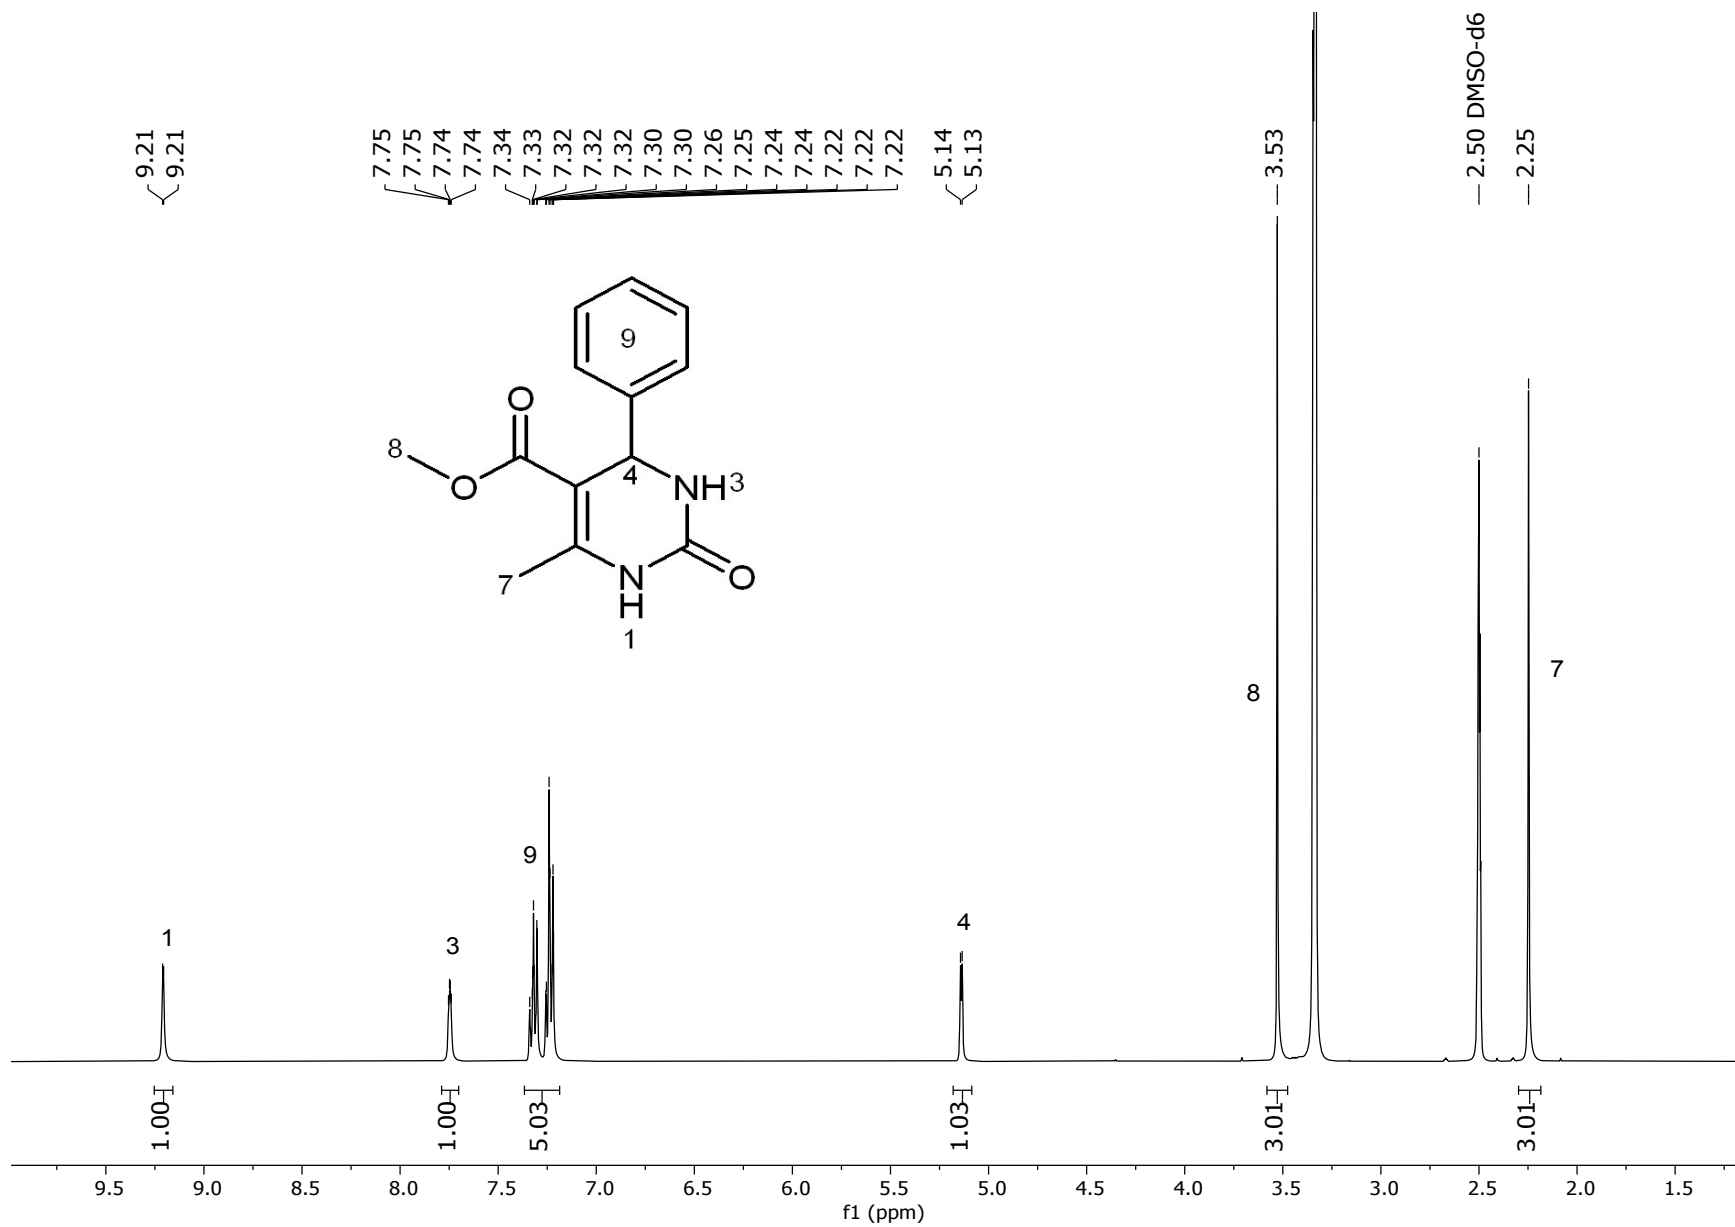

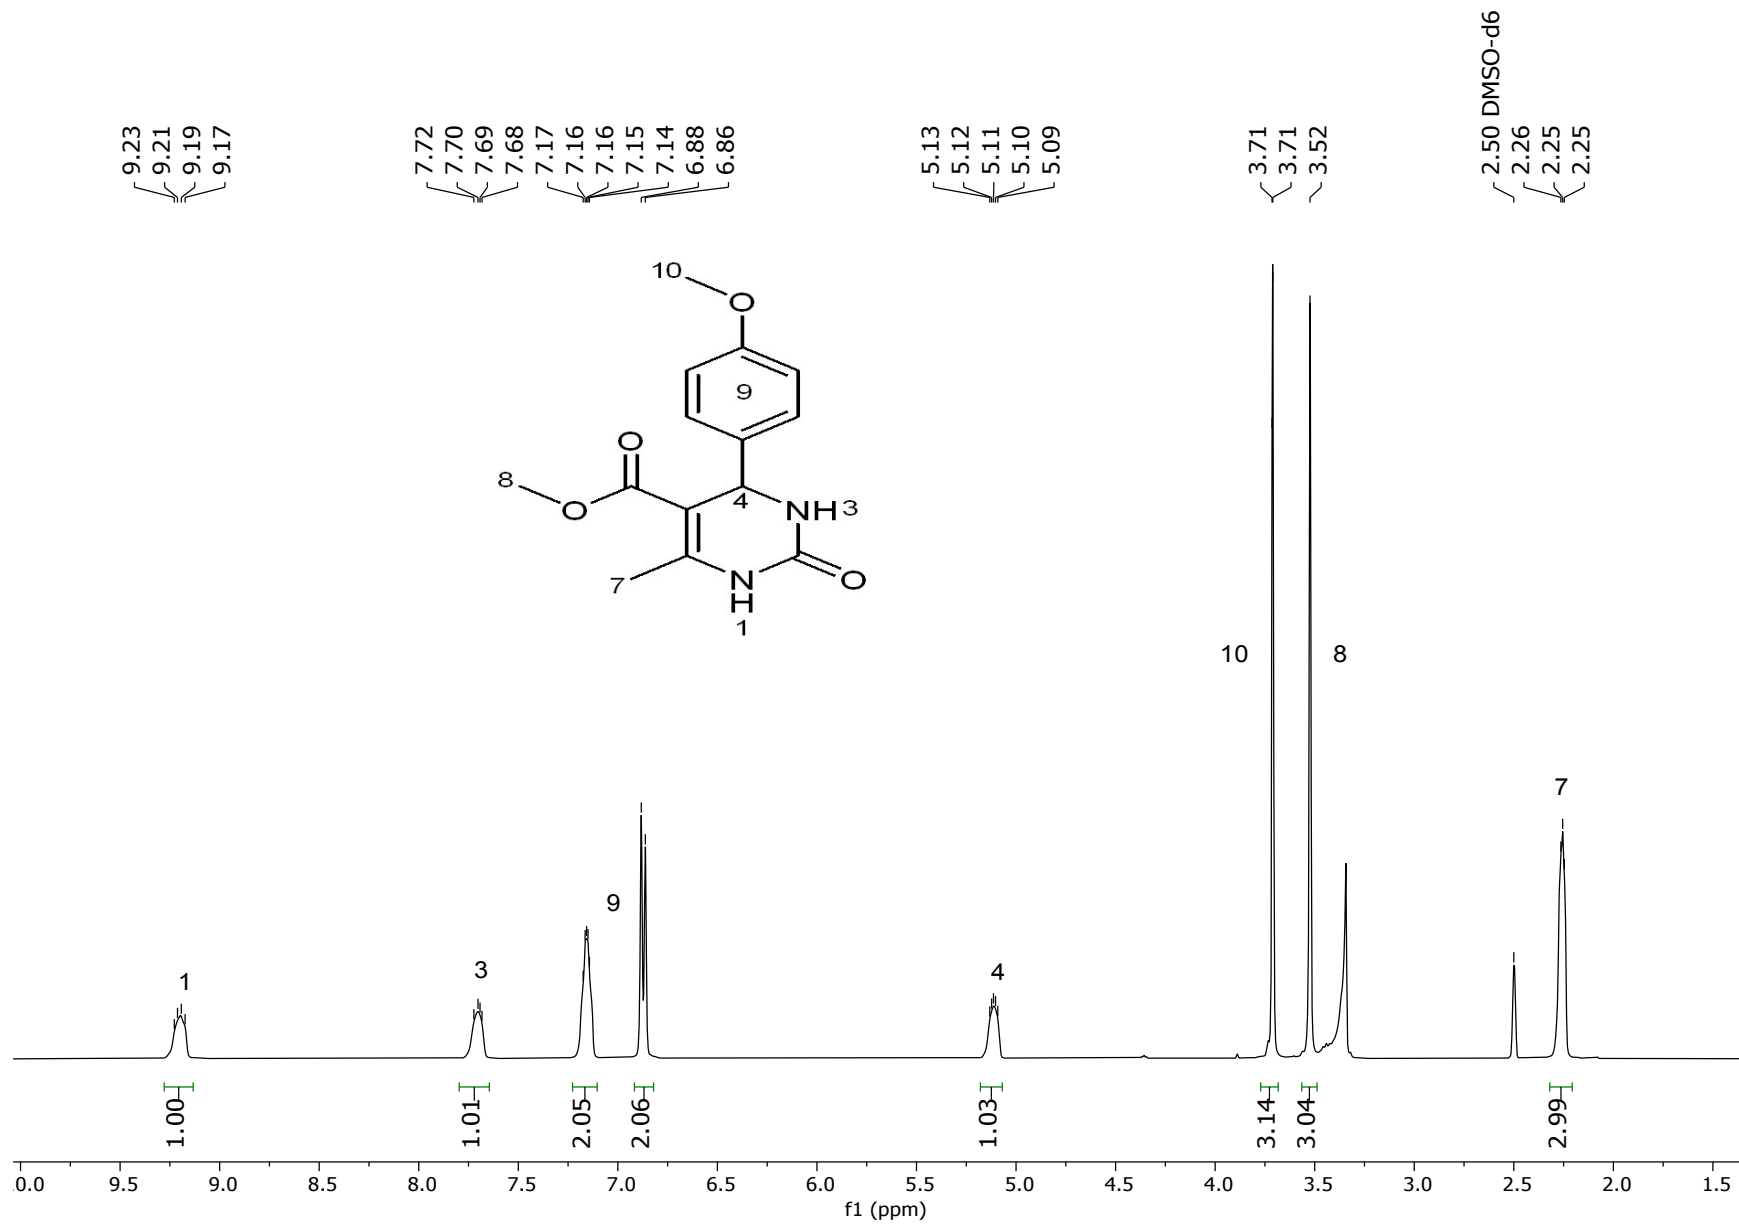

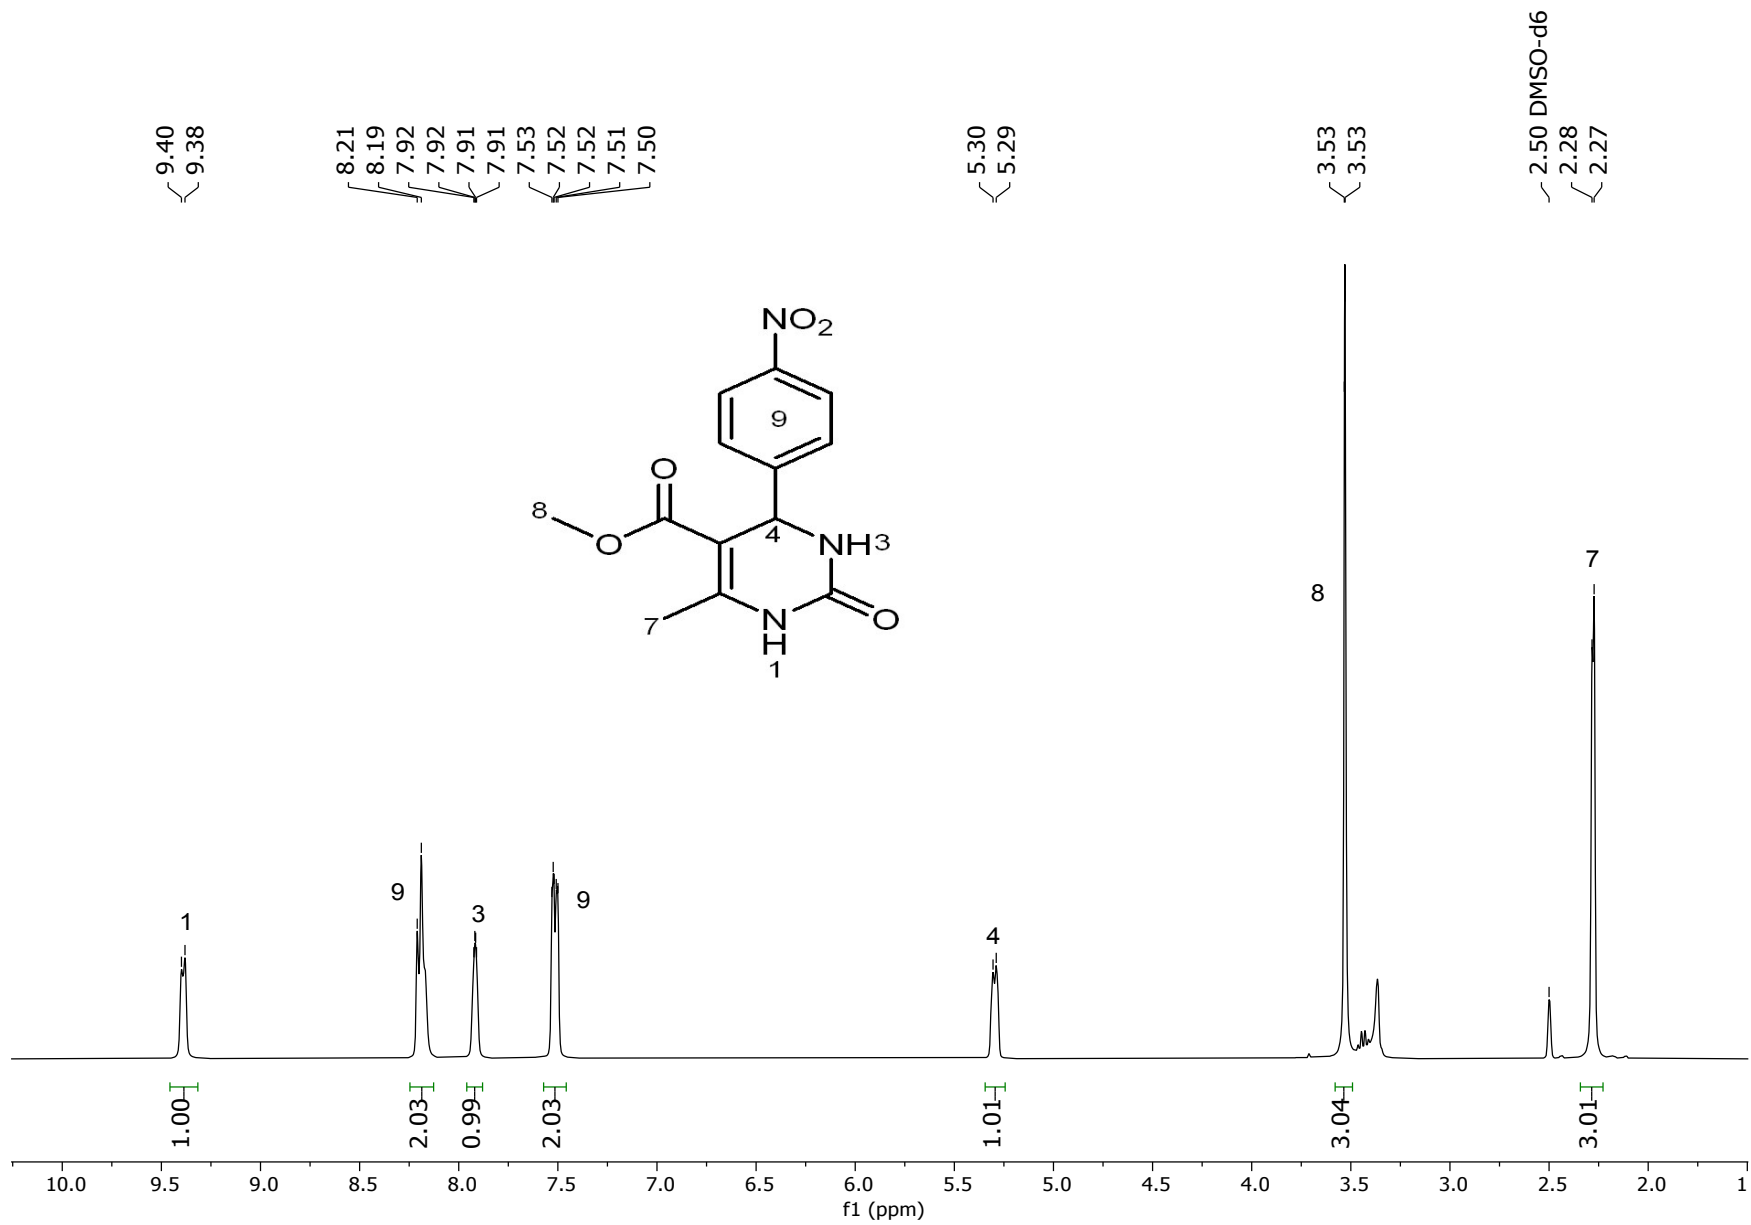

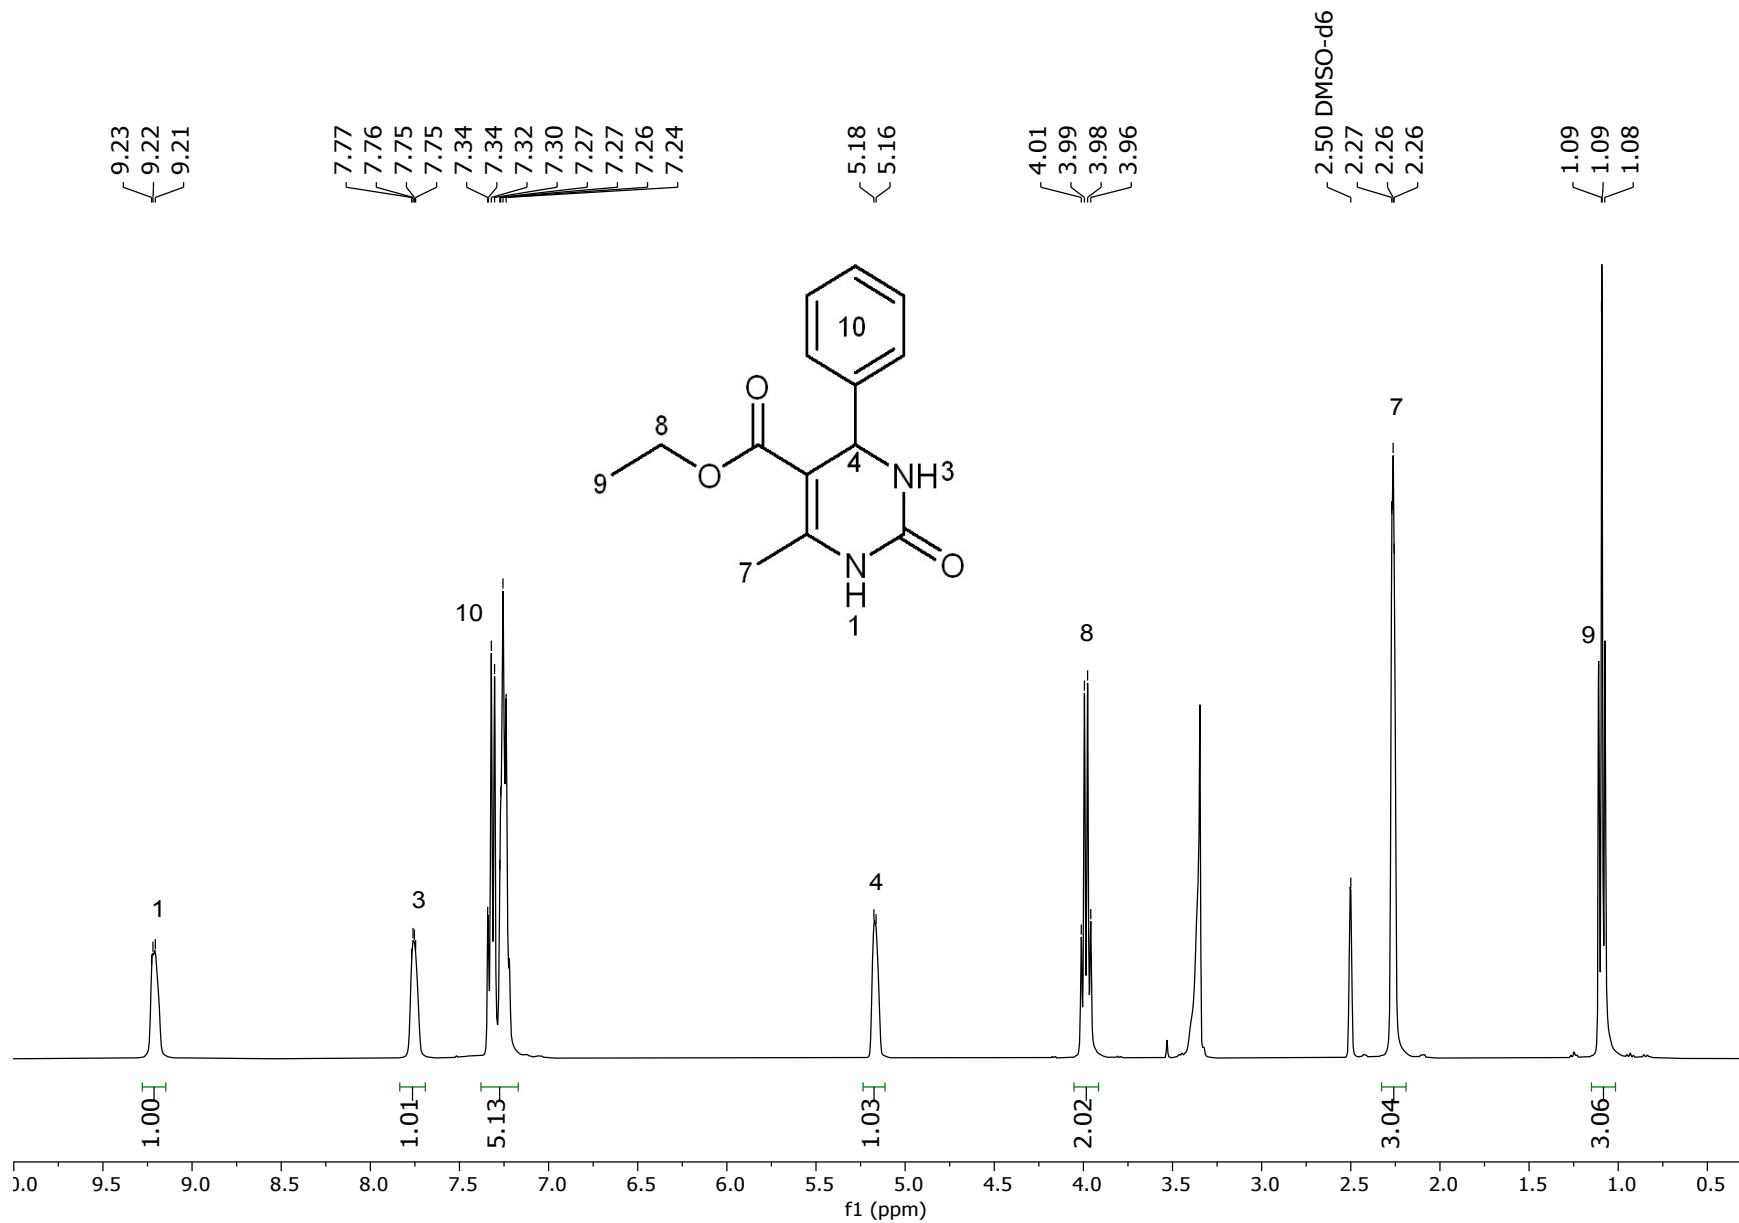



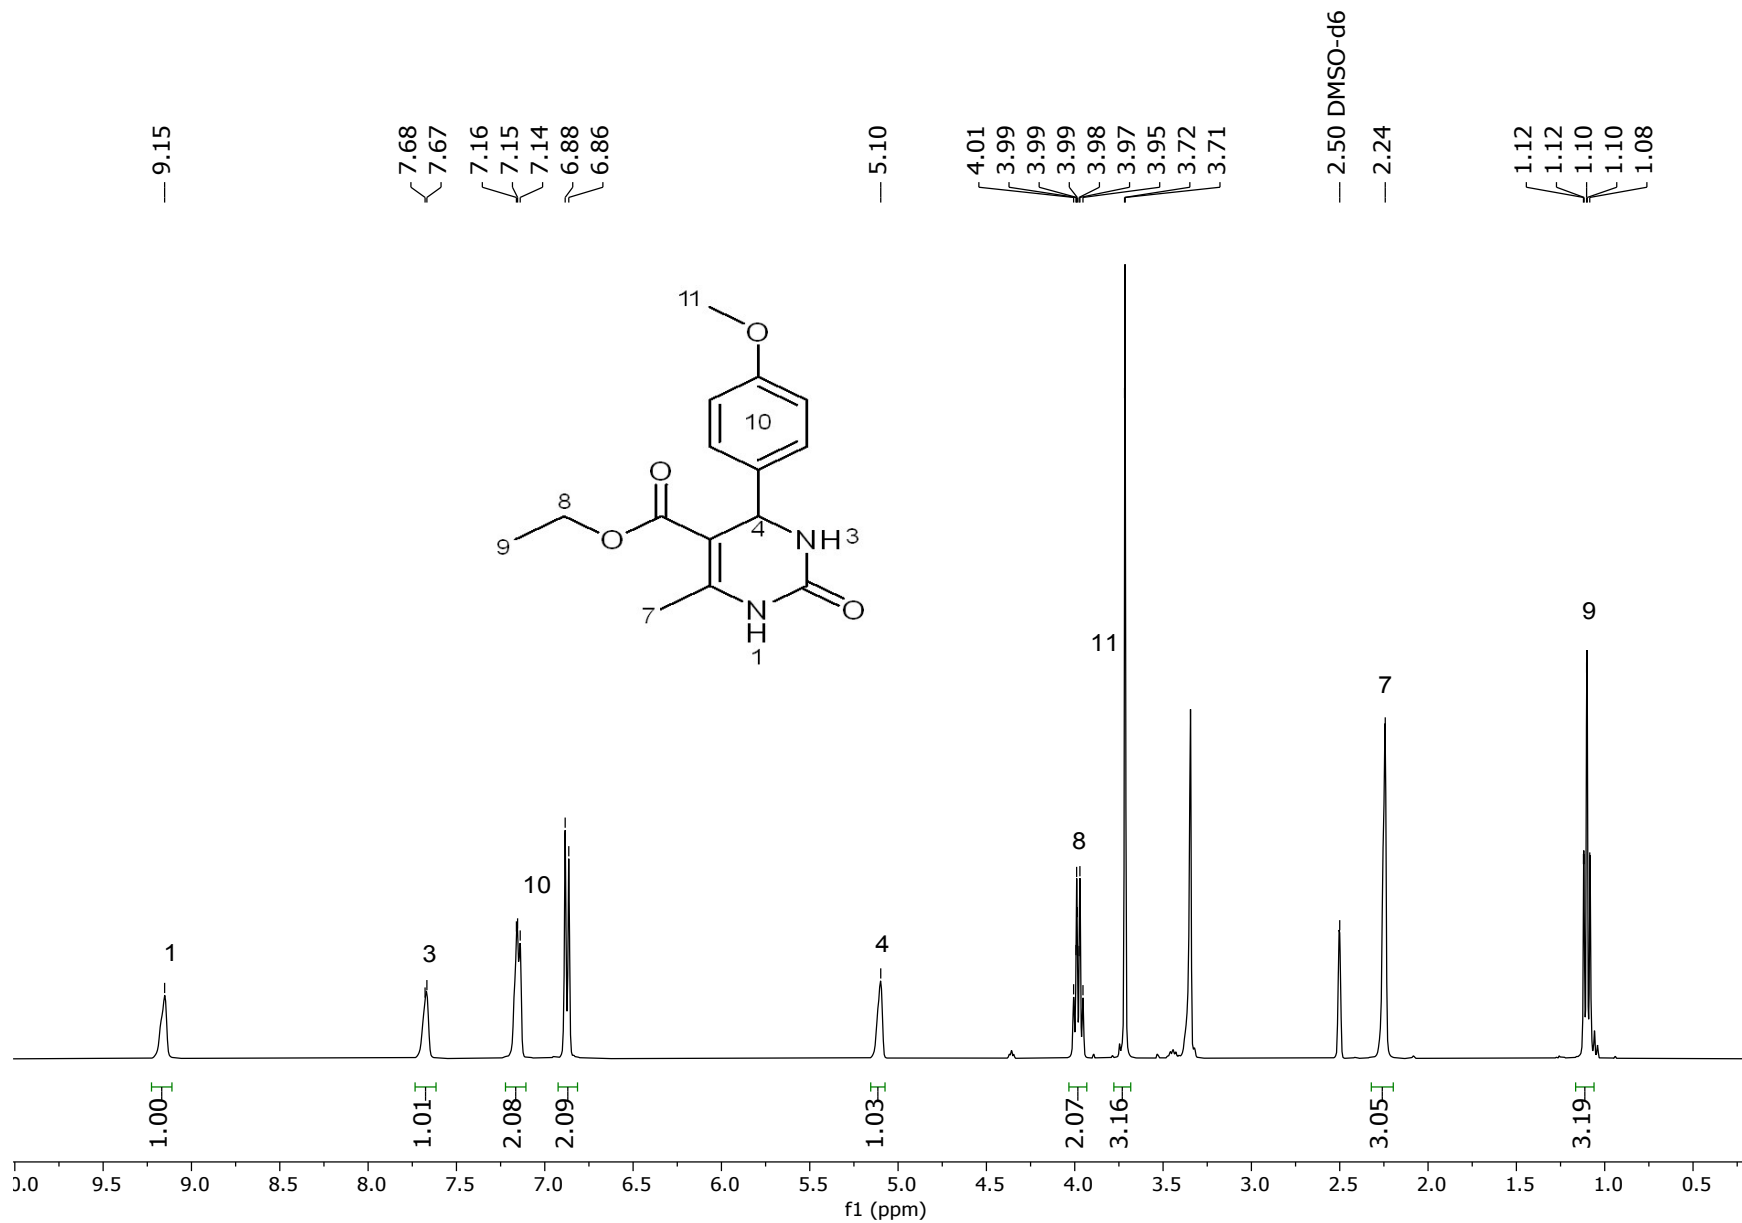

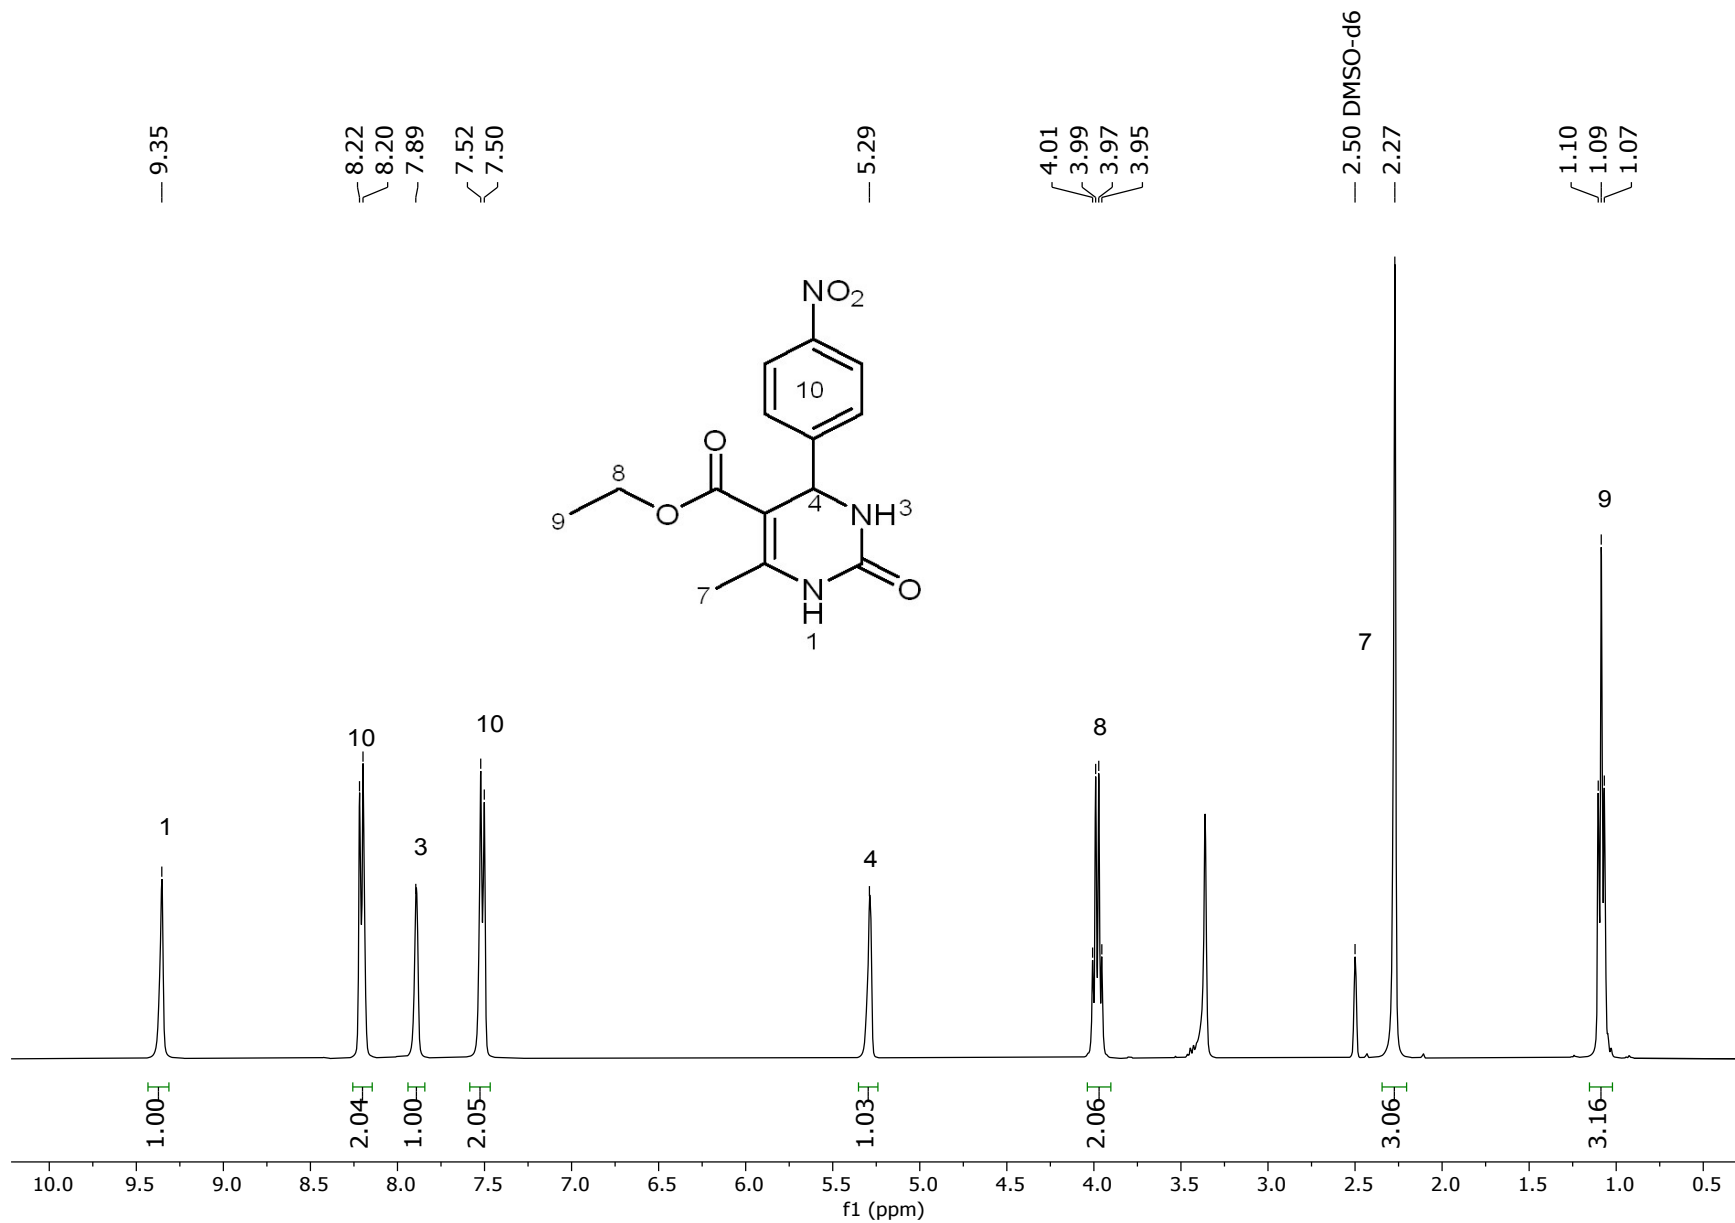

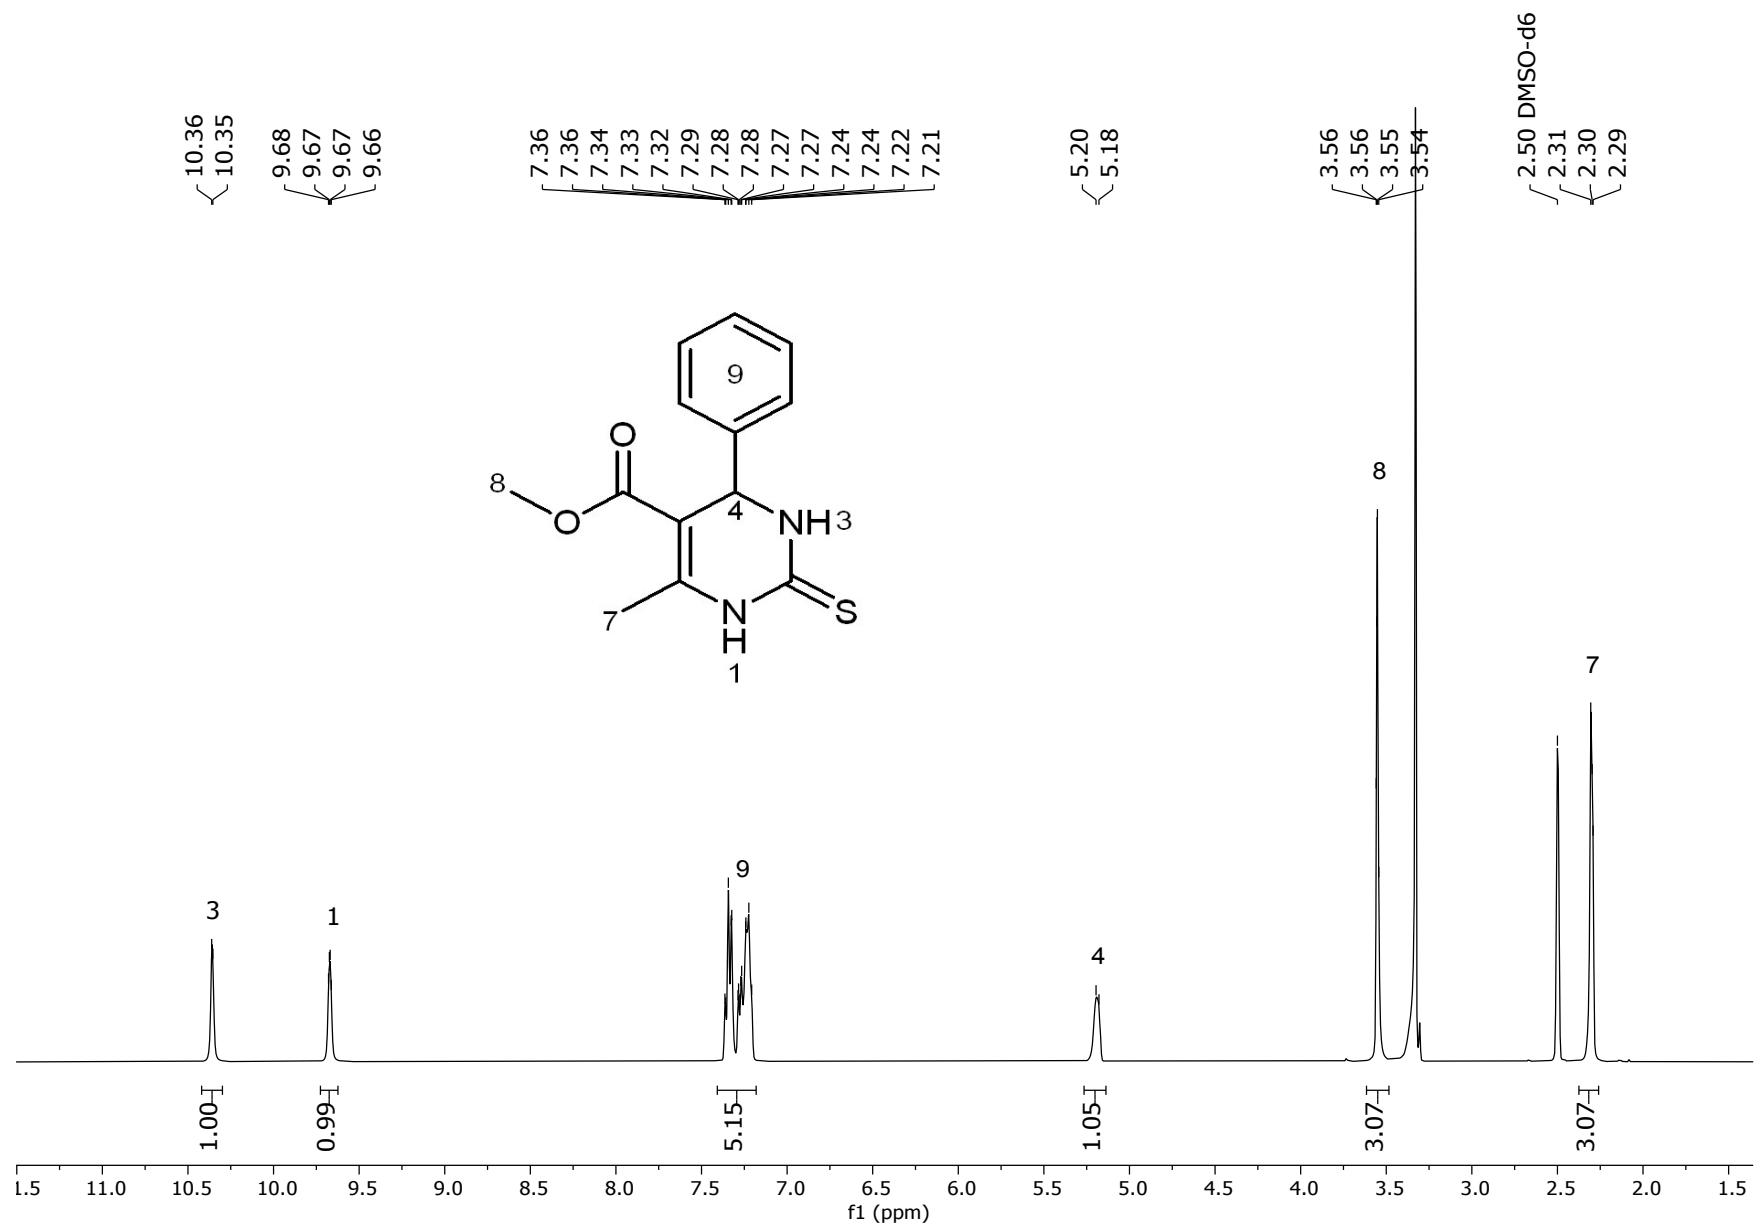

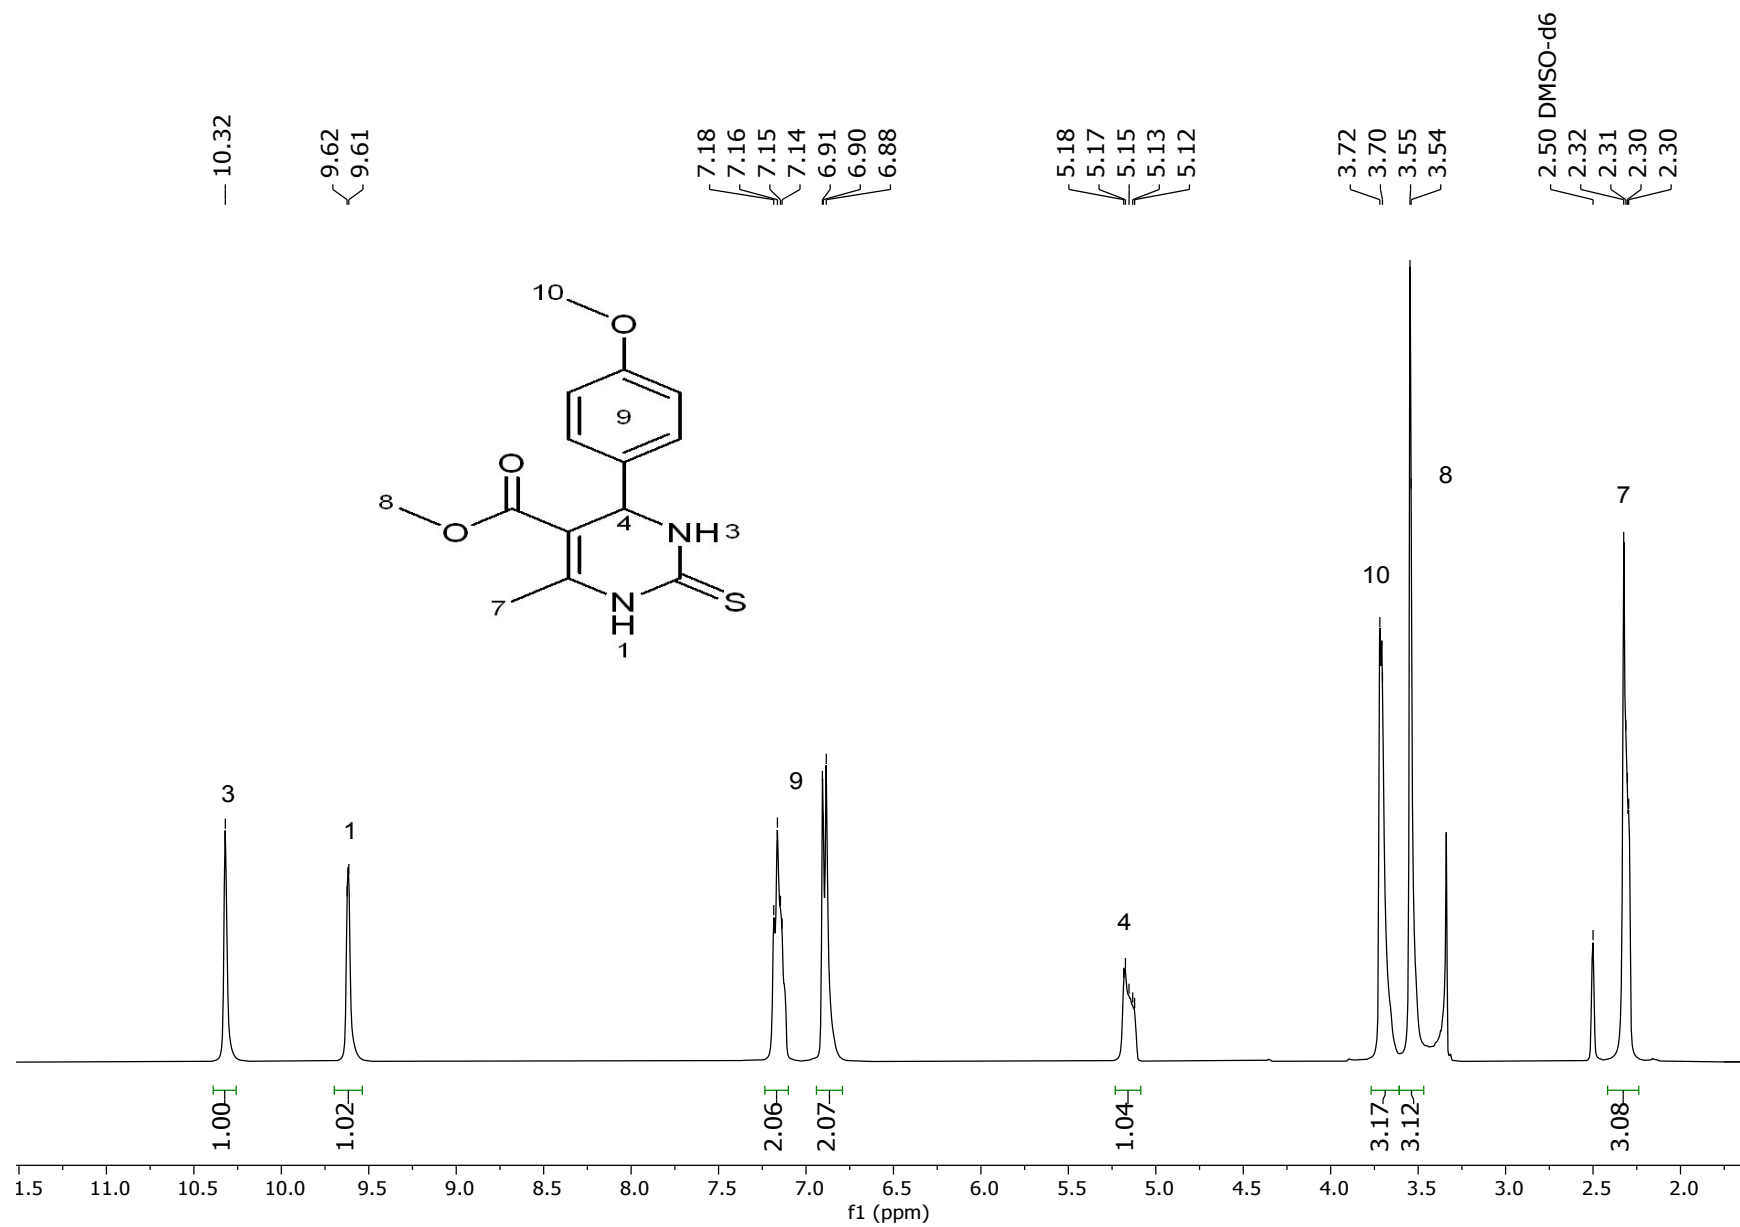

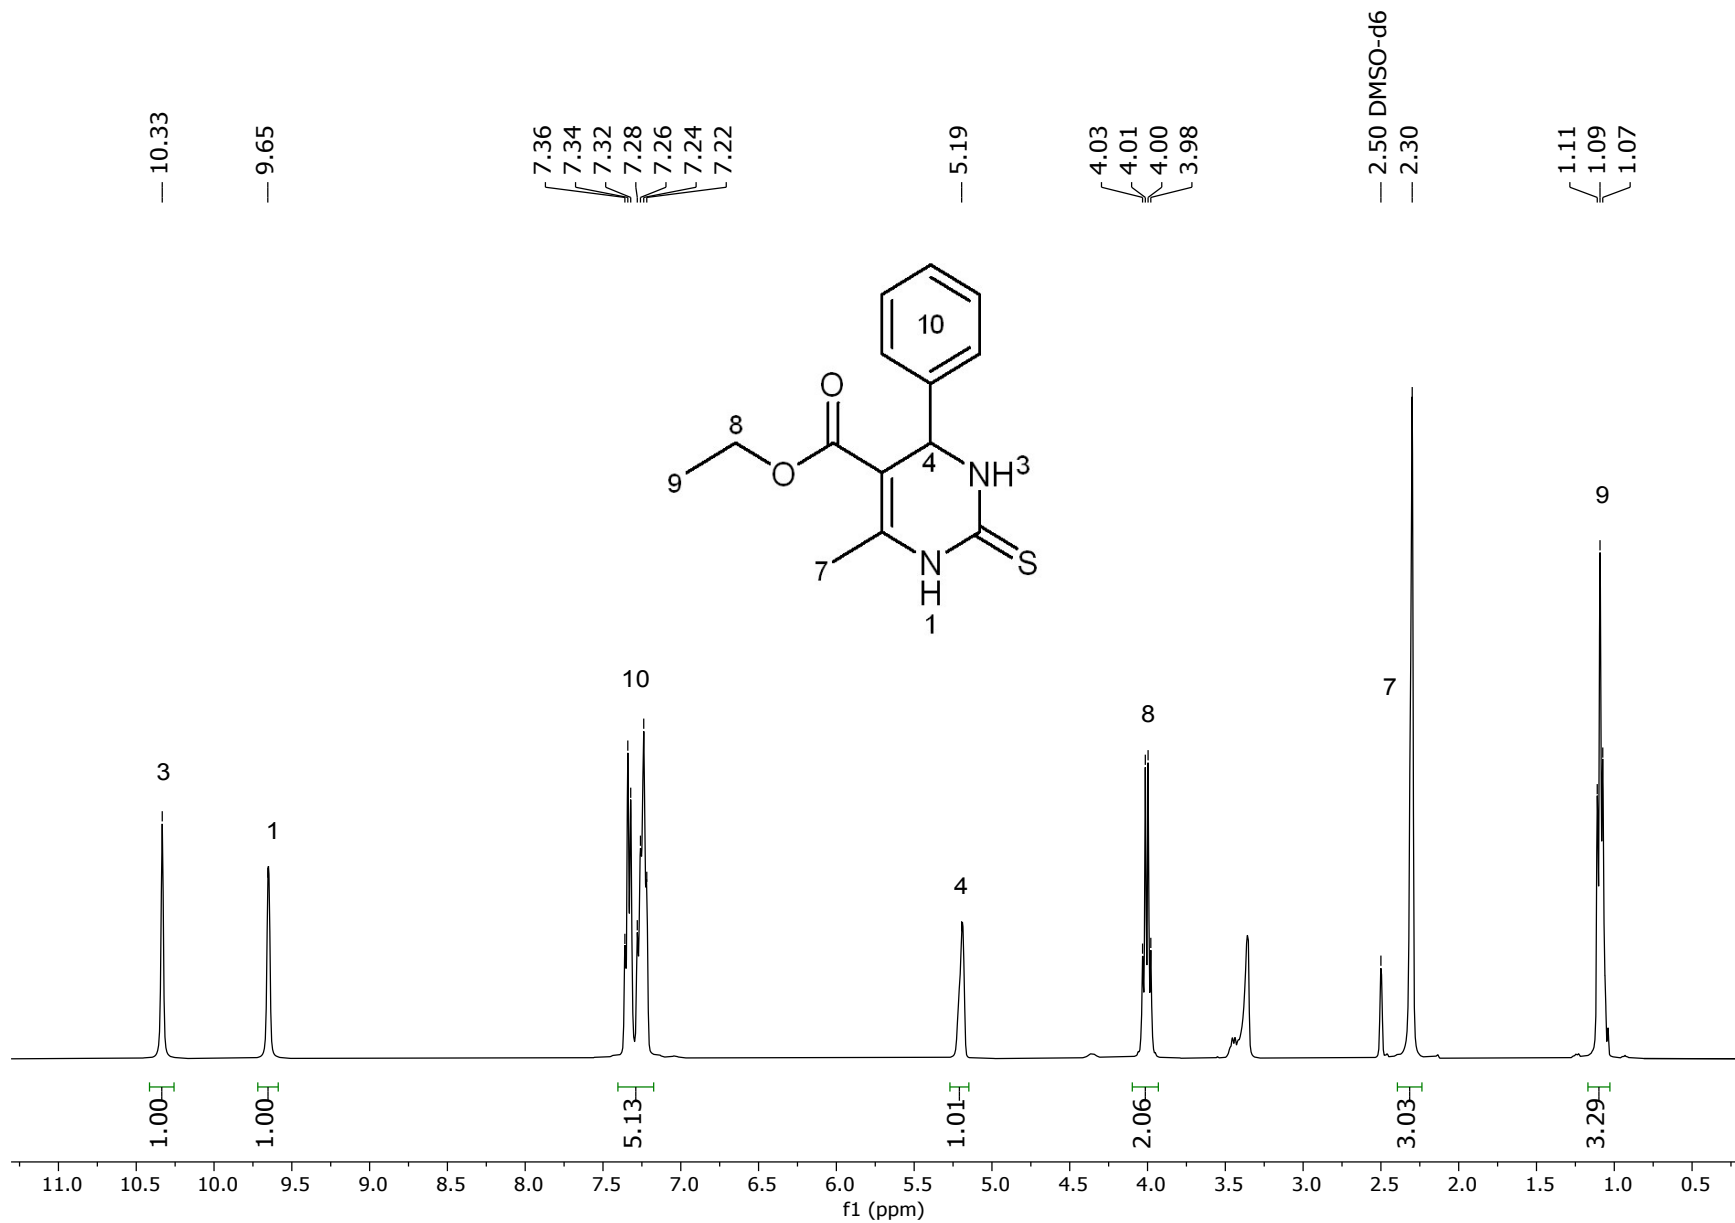

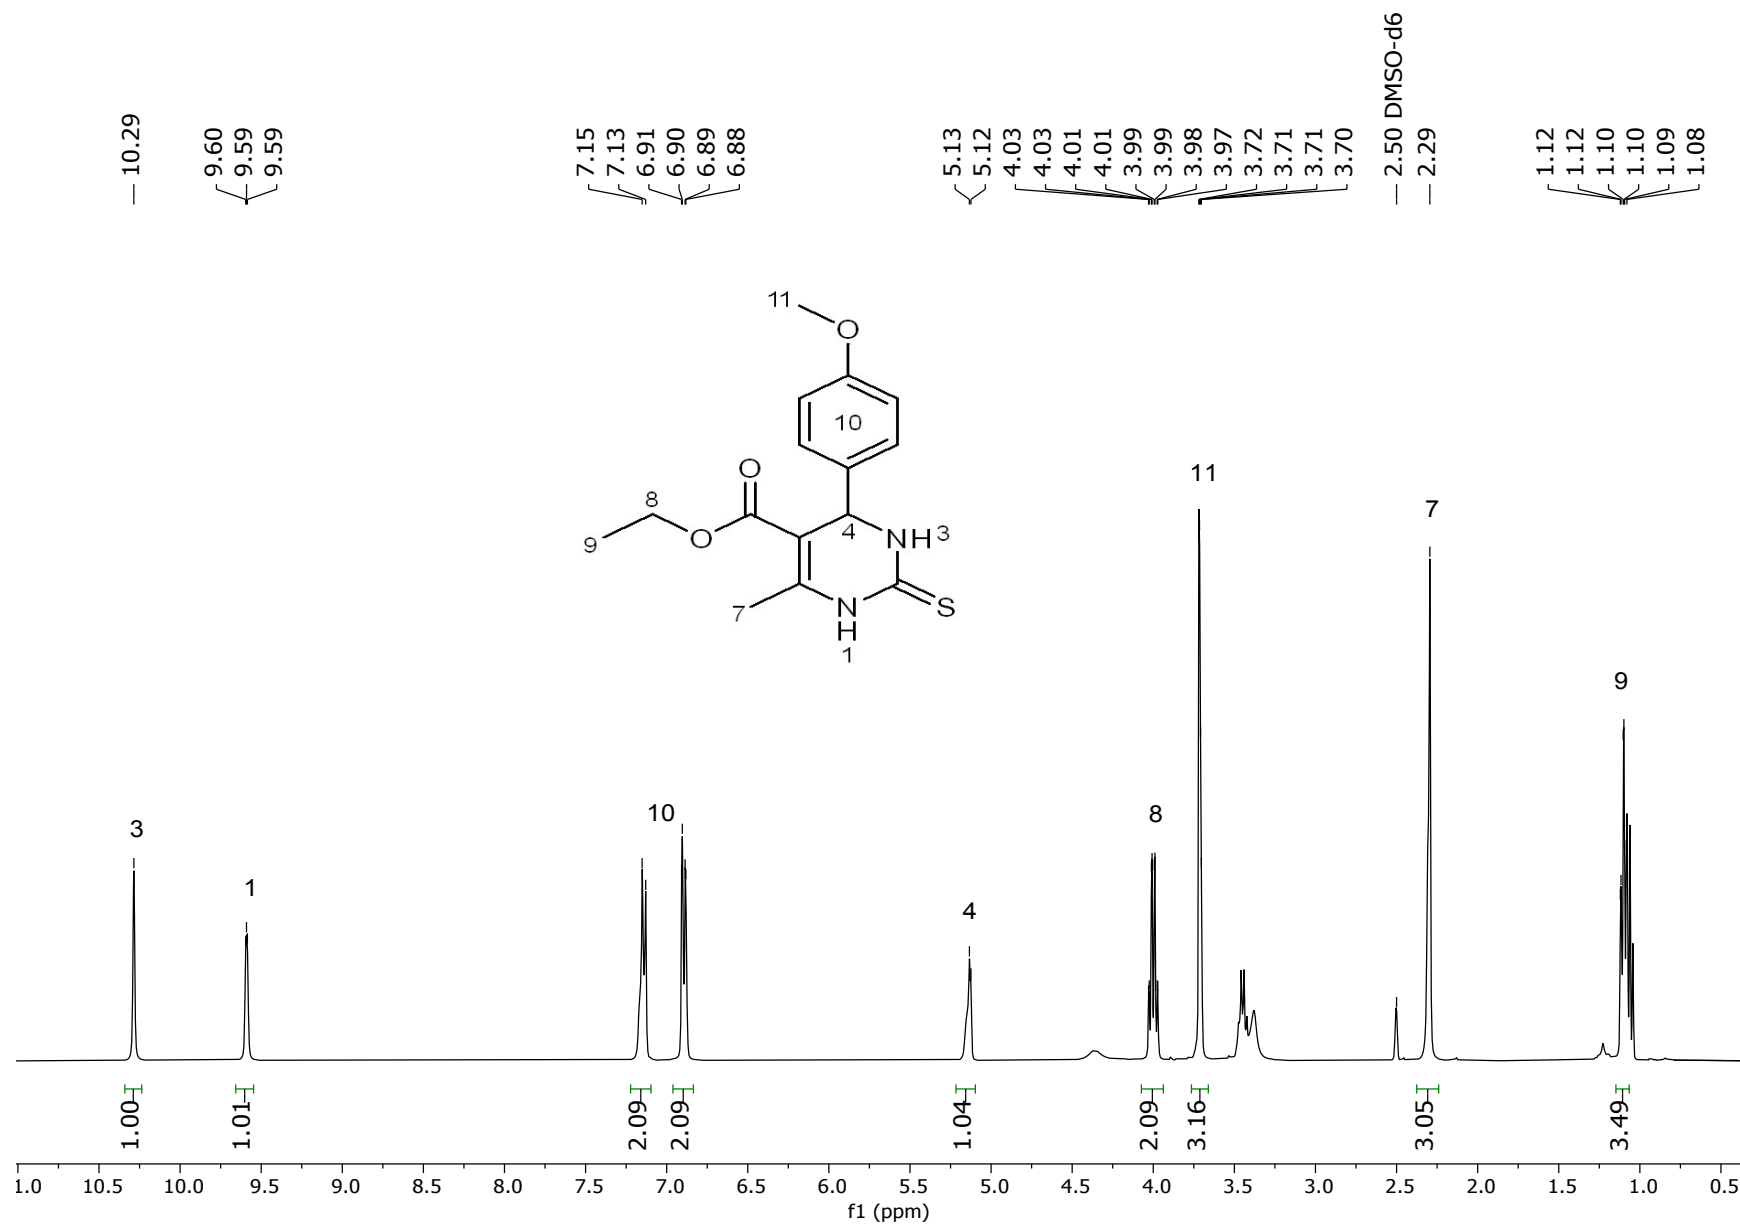

## Green chemistry metrics analysis

The following formulae were used for calculating Process Mass Intensity (PMI), E-factor, Solvent and Water Intensity (SI and WI).<sup>11-22</sup>

$$\text{PMI} = \frac{\text{Total mass of input material in the whole process}}{\text{Mass of product}}$$

$$\text{E Factor} = \text{PMI} - 1$$

$$\text{SI} = \frac{\text{Total mass of solvents excl. water in the whole process}}{\text{Mass of product}}$$

$$\text{WI} = \frac{\text{Total mass of water used in the whole process}}{\text{Mass of product}}$$

**Previous report, Process A (using p-cymene as reaction medium)<sup>1</sup>**

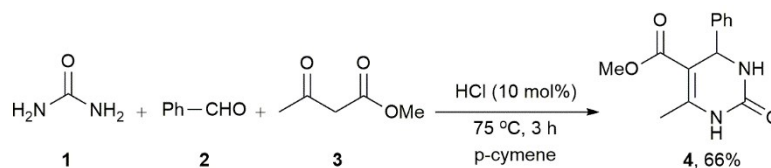

Reported procedures for process A do not always contain all the required information; therefore, some realistic assumptions were used where appropriate and are italicized in the calculations given below.

Experimental procedures: urea **1** (0.30 g, 5.00 mmol) and p-cymene (4 mL) were heated to 75 °C. upon reaching thermal equilibrium, benzaldehyde **2** (0.51 mL, 5.00 mmol), methyl 3-oxobutanoate **3** (0.81 mL, 7.50 mmol) and finally concentrated hydrochloric acid (10 mol%) were added to the mixture. The reaction was stirred at 300 rpm for a duration of 3 h. Upon completion of the reaction, the mixture was allowed to cool to ambient temperature. The resultant solid was separated from the reaction mixture by filtration, washed with 50% aqueous ethanol (15 mL) and recrystallised from ethanol (20 mL) to give a white crystalline solid **4** (0.81 g, 66%).

Materials used for metrics calculations: urea **1** (0.30 g, 5.00 mmol), benzaldehyde **2** (0.53 g, 5.00 mmol), methyl 3-oxobutanoate **3** (0.87 g, 7.50 mmol), HCl (0.02 g, 0.05 mmol), p-cymene (4 mL, 3.43 g) EtOH (27.5 mL, 22.0 g), H<sub>2</sub>O (7.5 mL, 7.5 g), compound **4** (0.81 g, 3.23 mmol).

$$\text{PMI (4)} = \frac{0.30 + 0.53 + 0.87 + 0.02 + 22.0 + 3.43 + 7.5}{0.81} = 43$$

$$\text{E Factor (4)} = 43 - 1 = 42$$

$$\text{SI (4)} = \frac{22.0 + 3.43}{0.81} = 31$$

$$\text{WI (4)} = \frac{7.5}{0.81} = 9$$



Previous report, Process B (using ethyl lactate as reaction medium)<sup>23</sup>

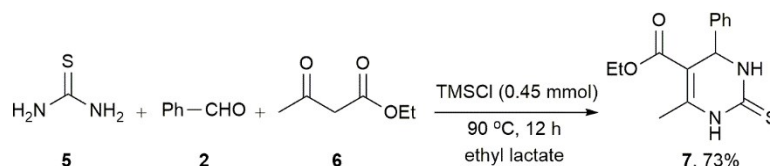

Reported procedures for process B do not always contain all the required information; therefore, some realistic assumptions were used where appropriate and are italicized in the calculations given below. Drying agents, when used, were not included in the calculations.

Experimental procedures: thiourea **5** (0.45 mmol), benzaldehyde **2** (0.30 mmol), ethyl acetoacetate **6** (0.30 mmol), TMSCl (0.45 mmol) and ethyl lactate (2 mL) were heated at 90 °C. The reaction was stirred for a duration of 12 h. Upon completion of the reaction, the mixture was allowed to cool to room temperature. Water (10 mL) was added, and the resulting mixture was extracted with ethyl acetate (3 x 10 mL). The organic phases were combined and dried over anhydrous Na<sub>2</sub>SO<sub>4</sub>. The solid was filtered out and the solution was subjected to vacuum evaporation to remove solvent. Finally, the residue was subjected to silica column chromatography (PE /EtOAc = 3:1, total 85 mL) to give compound **7** (0.061, 73%).

Materials used for metrics calculations: thiourea **5** (0.034 g, 0.45 mmol), benzaldehyde **2** (0.032 g, 0.30 mmol), methyl 3-oxobutanoate **6** (0.039 g, 0.30 mmol), TMSCl (0.049 g, 0.45 mmol), ethyl lactate (2 mL, 2.06 g) EtOAc (30 mL, 27 g), H<sub>2</sub>O (10 mL, 10 g), PE:EtOAc (85 mL, 68 g), compound **7** (0.061 g, 0.22 mmol).

$$\begin{array}{r}
 \text{PMI} \\
 0.034 + 0.032 + 0.039 + 0.049 + 2.06 + 27 + 10 + 68 \\
 \hline
 0.061 \\
 1,758
 \end{array}
 \begin{array}{l}
 (4) \\
 = \\
 =
 \end{array}$$

$$\text{E Factor (4)} = 1,758 - 1 = 1,757$$

$$\text{SI (4)} = \frac{2.06 + 27 + 68}{0.061} = 1,591$$

$$WI(4) = \frac{10}{0.061} = 164$$

### Current work, Process C1-C3 (This work)

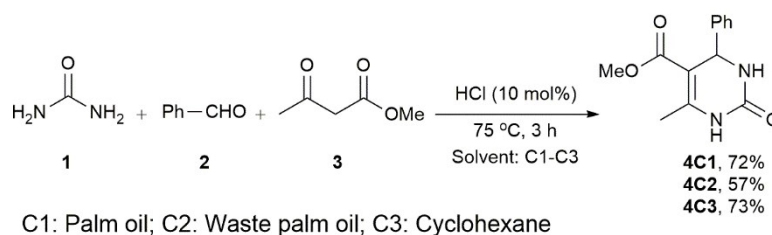

Experimental procedures: urea **1** (0.30 g, 5.00 mmol) and solvent (C1 or C2 or C3) (4 mL) were heated to 75 °C. upon reaching thermal equilibrium, benzaldehyde **2** (0.51 mL, 5.00 mmol), methyl 3-oxobutanoate **3** (0.81 mL, 7.50 mmol) and finally concentrated hydrochloric acid (10 mol%) were added to the mixture. The reaction was stirred at 300 rpm for a duration of 3 h. Upon completion of the reaction, the mixture was allowed to cool to ambient temperature. The resultant solid was separated from the reaction mixture by filtration, washed with 50% aqueous ethanol (15 mL) and recrystallised from ethanol (20 mL) to give a white crystalline solid **4** (0.91 g, 74%). Palm oil and waste palm oil can be recovered and reused. Preparative scale reaction was effectively accomplished using 40 mL of C1 (10-fold) leading to provide 8.8 g (72%) of product.

Materials used for metrics calculations: urea **1** (0.30 g, 5.00 mmol), benzaldehyde **2** (0.53 g, 5.00 mmol), methyl 3-oxobutanoate **3** (0.87 g, 7.50 mmol), HCl (0.02 g, 0.05 mmol), EtOH (17.5 mL, 13.80 g), H<sub>2</sub>O (2.5 mL, 2.5 g), cyclohexane C3 (4 mL, 3.12 g), compound **4C1** (0.91 g, 3.68 mmol), **4C2** (0.70, 2.83 mmol), **4C3** (0.91 g, 3.68 mmol). Palm oil and waste palm oil were not included in the calculations.<sup>11,15</sup>

### Palm oil (4C1, 10-fold)

$$PMI(4C1) = \frac{3.0 + 5.3 + 8.7 + 0.2 + 220 + 75}{8.8} = 35$$

$$E \text{ Factor}(4C1) = 35 - 1 = 34$$

$$\text{SI (4C1)} = \frac{220}{8.8} = 25$$

$$\text{WI (4C1)} = \frac{7.5}{8.8} = 9$$

Waste palm oil (4C2)

$$\text{PMI (4C2)} = \frac{0.30 + 0.53 + 0.87 + 0.02 + 22.0 + 7.5}{0.70} = 45$$

$$\text{E Factor (4C2)} = 45 - 1 = 44$$

$$\text{SI (4C2)} = \frac{22.0}{0.70} = 31$$

$$\text{WI (4C2)} = \frac{7.5}{0.70} = 11$$

Cyclohexane (4C3)

$$\text{PMI (4C3)} = \frac{0.30 + 0.53 + 0.87 + 0.02 + 22.0 + 7.5 + 3.12}{0.91} = 38$$

$$\text{E Factor (4C3)} = 38 - 1 = 37$$

$$SI(4C3) = \frac{22.0 + 3.12}{0.91} = 28$$

$$WI(4C3) = \frac{7.5}{0.91} = 8$$

## References

- 1 J. H. Clark, D. J. Macquarrie and J. Sherwood, *Chem. Eur. J.*, 2013, **19**, 5174–5182.
- 2 A. Mancini, E. Imperlini, E. Nigro, C. Montagnese, A. Daniele, S. Orrù and P. Buono, *Molecules*, 2015, **20**, 17339–17361.
- 3 G. Jensen, D. Ginsberg, P. Huerta, M. Citton and C. Drapeau, *JANA*, 2000, **2**, 51-65.
- 4 P. Zareh, A. A. Zare and B. Ghobadian, *Energy*, 2017, **139**, 883–894.
- 5 M. H. Gargari and S. M. Sadrameli, *Energy*, 2018, **148**, 888–895.
- 6 W. Abdelmoez, A. M. Tayeb, A. Mustafa and M. Abdelhamid, *Int J Chem React Eng*, 2016, **14**, 185–193.
- 7 E. F Aransiola, T. V Ojumu, O. O Oyekola and D. I. O Ikhuomoregbe, *Open Conf Proc J*, 2012, **3**, 18-22.
- 8 F. Byrne, B. Forier, G. Bossaert, C. Hoebbers, T. J. Farmer, J. H. Clark and A. J. Hunt, *Green Chem.*, 2017, **19**, 3671–3678.
- 9 P. G. Jessop, D. A. Jessop, D. Fu and L. Phan, *Green Chem.*, 2012, **14**, 1245–1259.
- 10 Y. Marcus, *J. Solution Chem.*, 1991, **20**, 929–944.
- 11 F. Roschangar, R. A. Sheldon and C. H. Senanayake, *Green Chem.*, 2015, **17**, 752–768.
- 12 C. Jiménez-González, D. J. C. Constable and C. S. Ponder, *Chem. Soc. Rev.*, 2012, **41**, 1485–1498.

- 13 C. Jiménez-González, C. S. Ponder, Q. B. Broxterman and J. B. Manley, *Org. Process Res. Dev.*, 2011, **15**, 912–917.
- 14 J. Augé, *Green Chem.*, 2008, **10**, 225–231.
- 15 J. Andraos, *Org. Process Res. Dev.*, 2005, **9**, 149–163.
- 16 D. J. C. Constable, A. D. Curzons and V. L. Cunningham, *Green Chem.*, 2002, **4**, 521–527.
- 17 X. Zhang, X. Ma, W. Qiu, J. Evans and W. Zhang, *Green Chem.*, 2019, **21**, 349–354.
- 18 A. Muthengi, X. Zhang, G. Dhawan, W. Zhang, F. Corsini and W. Zhang, *Green Chem.*, 2018, **20**, 3134–3139.
- 19 S. Abou-Shehada, P. Mampuys, B. U. W. Maes, J. H. Clark and L. Summerton, *Green Chem.*, 2017, **19**, 249–258.
- 20 N. J. Willis, C. A. Fisher, C. M. Alder, A. Harsanyi, L. Shukla, J. P. Adams and G. Sandford, *Green Chem.*, 2016, **18**, 1313–1318.
- 21 T. V. T. Phan, C. Gallardo and J. Mane, *Green Chem.*, 2015, **17**, 2846–2852.
- 22 C. R. McElroy, A. Constantinou, L. C. Jones, L. Summerton and J. H. Clark, *Green Chem.*, 2015, **17**, 3111–3121.
- 23 Z. Xu, Y. Jiang, S. Zou and Y. Liu, *Phosphorus Sulfur Silicon*, 2014, **189**, 791–795.
